# Supplementary material for: Structure-Based Identification of Potent Natural Product Chemotypes as Cannabinoid Receptor 1 Inverse Agonists
Source: PubMed Central journal article supplement (PMC6222380; doi:10.3390/molecules23102630), 2018-10-13
Supplement: molecules-23-02630-s001.pdf [file molecules-23-02630-s001.pdf]

## *Supporting Information*

# Structure-Based Identification of Potent Natural Product Chemotypes as Cannabinoid Receptor 1 Inverse Agonists

Pankaj Pandey <sup>1</sup>, Kuldeep K. Roy <sup>1,3</sup>, Haining Liu <sup>1</sup>, Guoyi Ma <sup>1</sup>, Sara Pettaway <sup>1,§</sup>, Walid F. Alsharif <sup>1,⊥</sup>, Rama S. Gadepalli <sup>1</sup>, John M. Rimoldi <sup>1,2</sup>, Christopher R. McCurdy <sup>1,2,#</sup>, Stephen J. Cutler <sup>1,2,†</sup> and Robert J. Doerksen <sup>1,2,\*</sup>

<sup>1</sup> Department of BioMolecular Sciences, Division of Medicinal Chemistry, School of Pharmacy, The University of Mississippi, University, MS 38677, USA

<sup>2</sup> National Center for Natural Products Research, School of Pharmacy, The University of Mississippi, University, MS 38677, USA

<sup>3</sup> National Institute of Pharmaceutical Education and Research, 168, Manicktala Main Road, Kolkata 700054, WB, India

\* Correspondence: rjd@olemiss.edu; Tel.: +1-662-915-7052

**Footnote:** Current addresses of co-authors;

§ Eshelman School of Pharmacy, University of North Carolina, Chapel Hill, NC 27599, USA

⊥ Department of Psychiatry and Behavioral Neurosciences, Wayne State University, School of Medicine, Detroit MI 48202, USA

# Department of Medicinal Chemistry, College of Pharmacy, University of Florida, Gainesville FL 32610, USA

† College of Pharmacy, University of South Carolina, Columbia SC 29208, USA

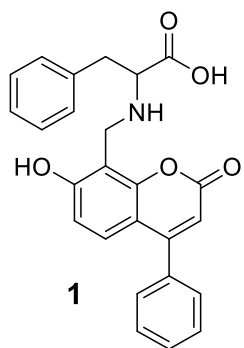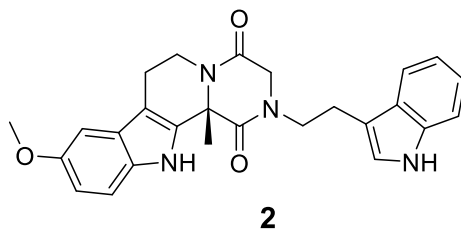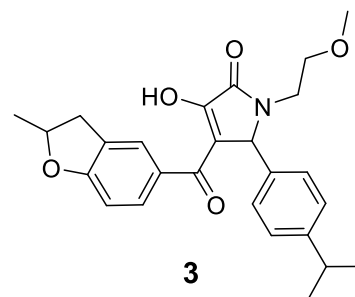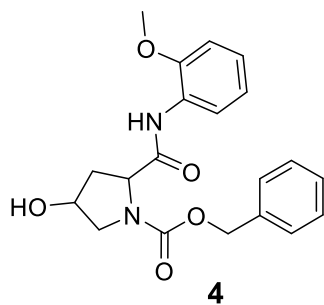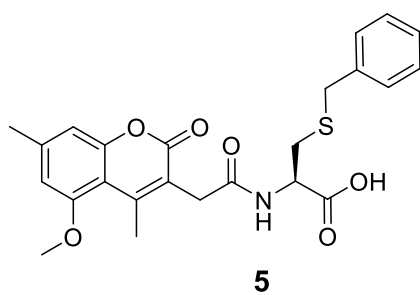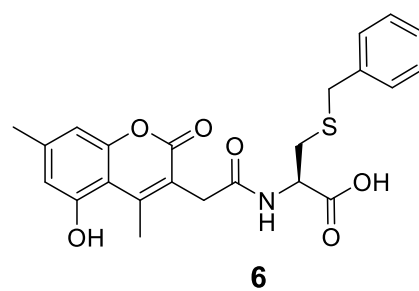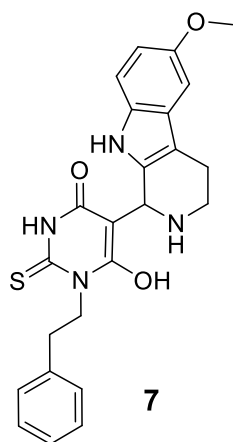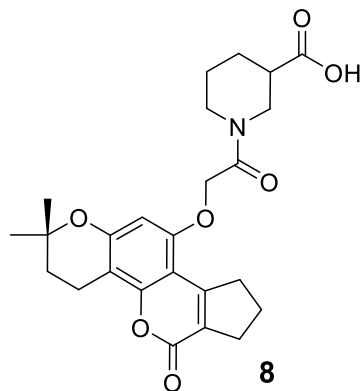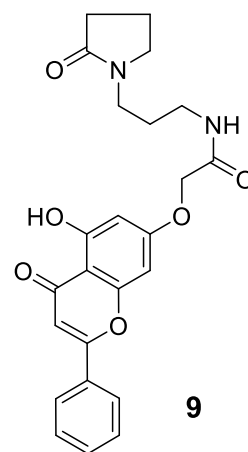

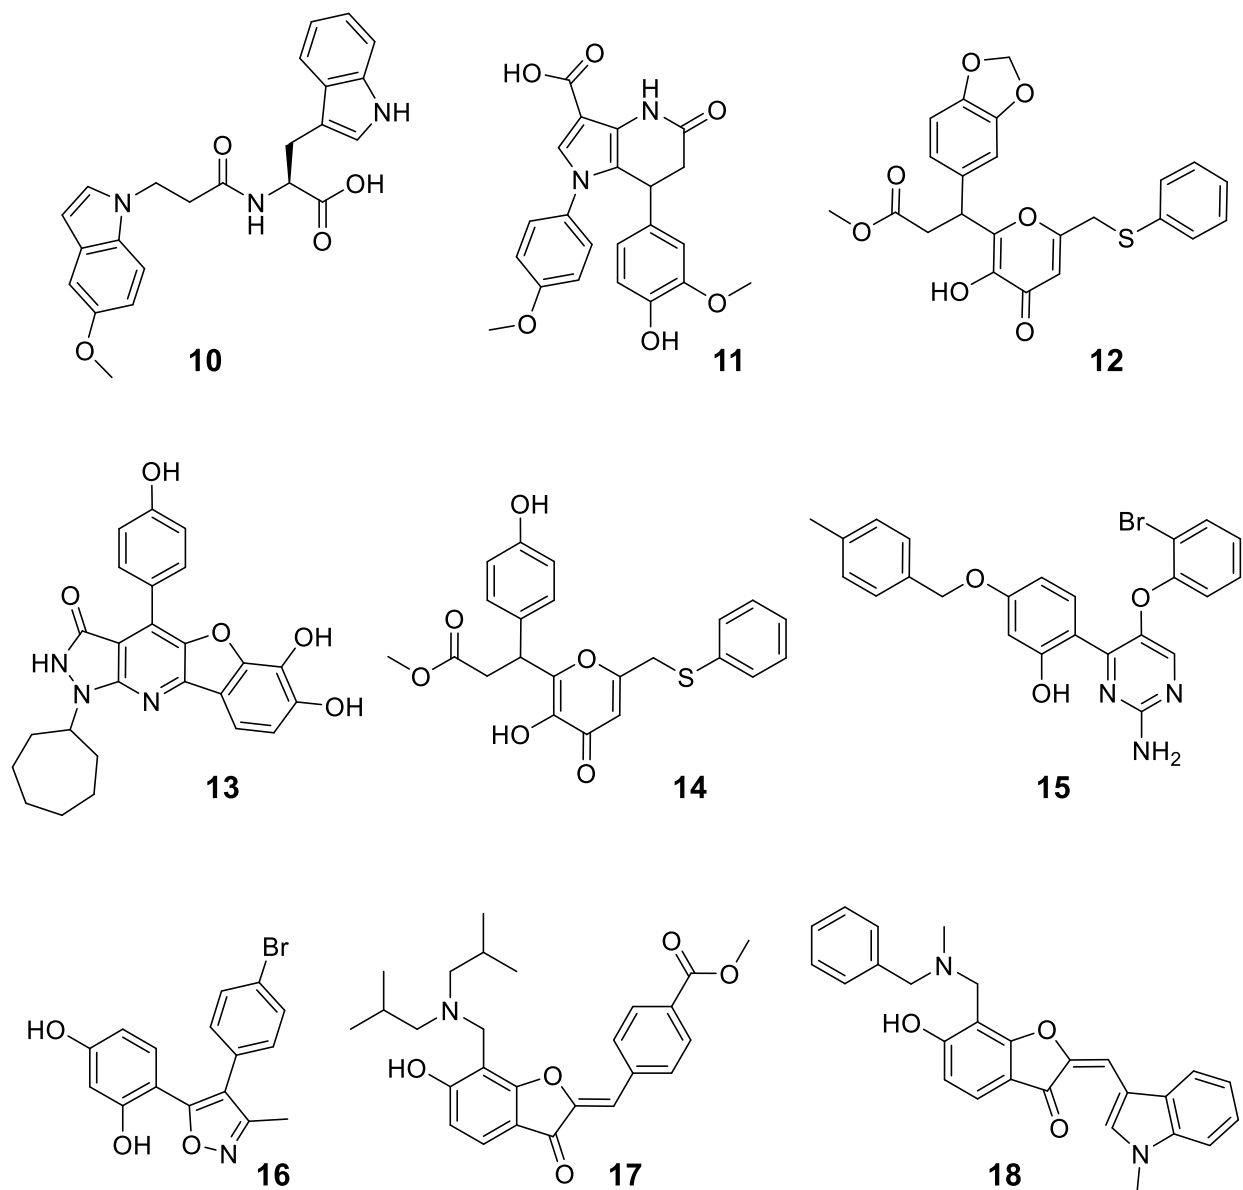

**Figure S1.** Chemical structures of the eighteen selected hits used for *in vitro* study.

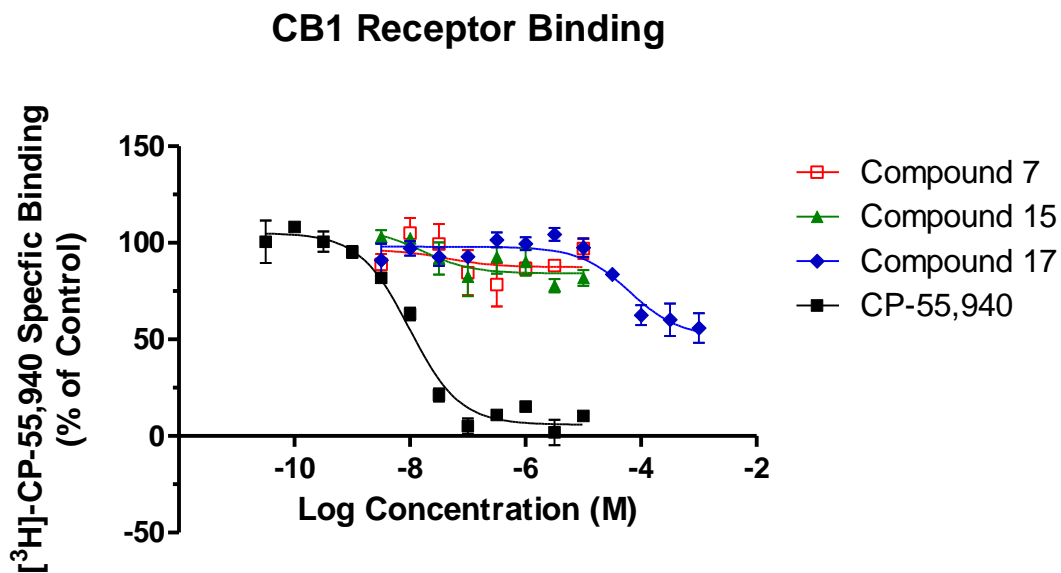

**Figure S2.** The displacement binding curves for compounds 7, 15 and 17 obtained from the radioligand competitive binding assay. CP55,940 was used as a positive control.

**Table S1.** The percentage (%) displacement of radioligand at CB1 and CB2 receptors for all eighteen screened compounds.

| Compound number | Sample name   | ZINC code    | Docking score ‡ | % displacement at 10 $\mu$ M |      |
|-----------------|---------------|--------------|-----------------|------------------------------|------|
|                 |               |              |                 | CB1                          | CB2  |
| 1*              | STOCK1N-06857 | ZINC00940539 | -10.153         | 14.1                         | -    |
| 2               | STOCK1N-34850 | ZINC09033729 | -9.975          | 81.8                         | 67.2 |
| 3*              | STOCK1N-43108 | ZINC09374751 | -9.74           | -                            | 51   |
| 4*              | STOCK1N-43876 | ZINC00861983 | -9.60           | 13.9                         | -    |
| 5               | STOCK1N-51636 | ZINC02118939 | -11.119         | 14                           | 15.5 |
| 6               | STOCK1N-53876 | ZINC02123699 | -11.517         | 28                           | 26.7 |
| 7*              | STOCK1N-62719 | ZINC20755817 | -12.295         | 49.7                         | 15.7 |
| 8*              | STOCK1N-68672 | ZINC08879802 | -9.777          | 30.5                         | 7    |
| 9               | STOCK1N-69353 | ZINC12896219 | -9.804          | 28.6                         | 30.2 |
| 10              | STOCK1N-73177 | ZINC20763677 | -9.014          | 30.2                         | 17.3 |
| 11*             | STOCK1N-75513 | ZINC40313209 | -10.73          | 37.6                         | 13.1 |
| 12*             | STOCK1N-79387 | ZINC85875400 | -11.723         | 69.9                         | 63   |
| 13              | STOCK1N-79693 | ZINC85877048 | -9.638          | 23.1                         | 37.4 |
| 14*             | STOCK1N-80140 | ZINC85879663 | -9.967          | 18.7                         | 30   |
| 15              | STOCK5S-41625 | ZINC02229040 | -10.459         | 57.6                         | 35.5 |
| 16              | STOCK6S-13543 | ZINC06757795 | -9.378          | 61.8                         | 40.2 |
| 17              | STOCK6S-34022 | ZINC08823658 | -9.818          | 50.4                         | 35   |
| 18              | STOCK6S-39252 | ZINC28182437 | -10.436         | 69                           | 61.2 |

‡ Kcal/mol; \* Racemic

**Table S2.** Physicochemical and other selected properties related to drug-likeness for all eighteen tested hits.

| Compound number        | MW      | QPLogP | #HBA <sup>a</sup> | #HBD <sup>b</sup> | PSA <sup>c</sup> | #RB <sup>d</sup> |
|------------------------|---------|--------|-------------------|-------------------|------------------|------------------|
| <b>1</b> <sup>e</sup>  | 415.45  | 1.710  | 7                 | 3                 | 117.402          | 8                |
| <b>2</b>               | 442.52  | 3.886  | 6                 | 1                 | 87.903           | 4                |
| <b>3</b> <sup>e</sup>  | 435.519 | 4.406  | 7.2               | 0                 | 91.620           | 7                |
| <b>4</b> <sup>e</sup>  | 370.404 | 3.233  | 7.45              | 2                 | 98.812           | 6                |
| <b>5</b>               | 455.525 | 4.160  | 7.5               | 1.25              | 123.966          | 9                |
| <b>6</b>               | 441.498 | 3.403  | 7.5               | 2.25              | 137.364          | 9                |
| <b>7</b> <sup>e</sup>  | 448.539 | 4.696  | 4.25              | 3                 | 103.898          | 5                |
| <b>8</b> <sup>e</sup>  | 455.507 | 2.872  | 9                 | 1                 | 126.134          | 4                |
| <b>9</b>               | 436.463 | 2.170  | 8                 | 1                 | 132.713          | 8                |
| <b>10</b>              | 405.45  | 4.572  | 4.5               | 2.25              | 107.384          | 8                |
| <b>11</b> <sup>e</sup> | 408.410 | 3.121  | 5.75              | 2                 | 129.267          | 4                |
| <b>12</b> <sup>e</sup> | 440.47  | 3.924  | 7.25              | 1                 | 109.649          | 8                |
| <b>13</b>              | 445.474 | 3.789  | 4.75              | 4                 | 123.602          | 5                |
| <b>14</b> <sup>e</sup> | 412.456 | 3.350  | 6.5               | 2                 | 113.379          | 9                |
| <b>15</b>              | 478.344 | 4.918  | 4.5               | 3                 | 83.400           | 8                |
| <b>16</b>              | 346.18  | 3.153  | 3                 | 2                 | 69.421           | 2                |
| <b>17</b>              | 437.535 | 3.971  | 7.25              | 1                 | 94.545           | 10               |
| <b>18</b>              | 424.5   | 4.597  | 5.25              | 1                 | 65.049           | 7                |

<sup>a</sup> Number of Hydrogen Bond Acceptors; <sup>b</sup> Number of Hydrogen Bond Donor; <sup>c</sup> Polar Surface Area; <sup>d</sup> Number of Rotatable Bonds; <sup>e</sup> Racemic.
